# Supplementary material for: Effect of A- or B-Site Sc Doping on Sintering Temperature, Crystal Structure, Microstructure, and Properties of BaZrxTi1−xO3 Ceramics
Source: MDPI journal article supplement (doi:10.3390/ma16206635), 2023-10-11
Supplement: s1 [file s1]

# Effect of A- or B-Site Sc Doping on Sintering Temperature, Crystal Structure, Microstructure, and Properties of $\text{BaZr}_x\text{Ti}_{1-x}\text{O}_3$ Ceramics

Kaituo Zhang <sup>1</sup>, Tiantian Li <sup>2</sup> and Yuan Xu <sup>3,\*</sup>

<sup>1</sup> Henan Key Laboratory of Wire and Cable Structures and Materials, School of Cable Engineering, Henan Institute of Technology, Xinxiang 453003, China

<sup>2</sup> Engineering Technology Education Center, Henan Institute of Technology, Xinxiang 453003, China;

<sup>3</sup> College of Materials Sciences and Engineering, Henan Institute of Technology, Xinxiang 453003, China

\* Correspondence: xuyuan94@163.com

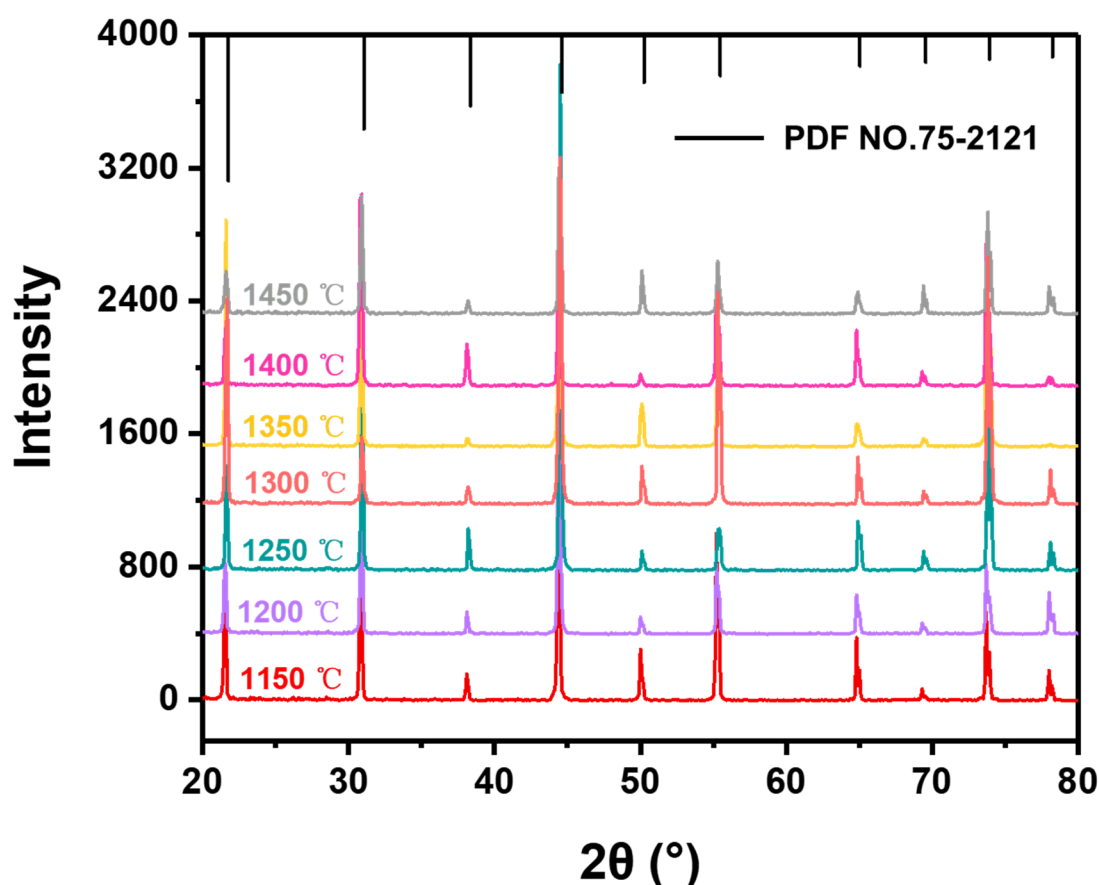

Figure S1. XRD patterns for the BZT-1.5mol % ceramics at different sintering temperatures.

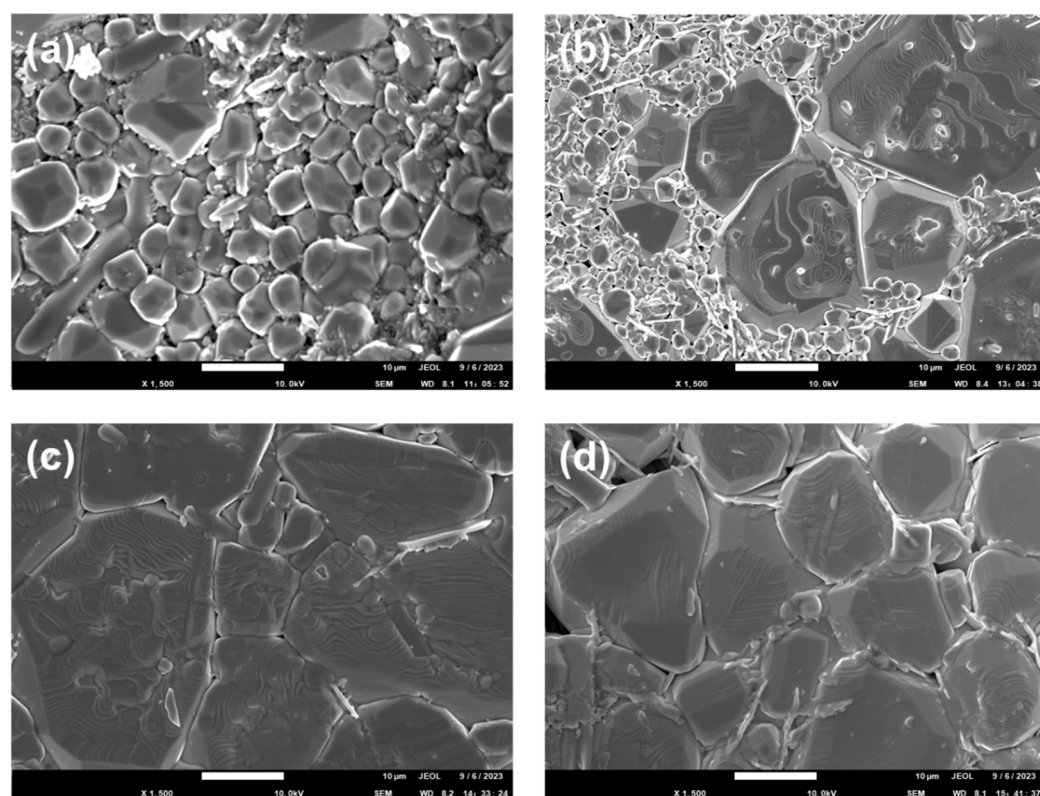

**Figure S2.** SEM images of BZT-1.5 % mol ceramics at sintering temperature of (a) 1150, (b) 1200, (c) 1250 and (d) 1350 °C.

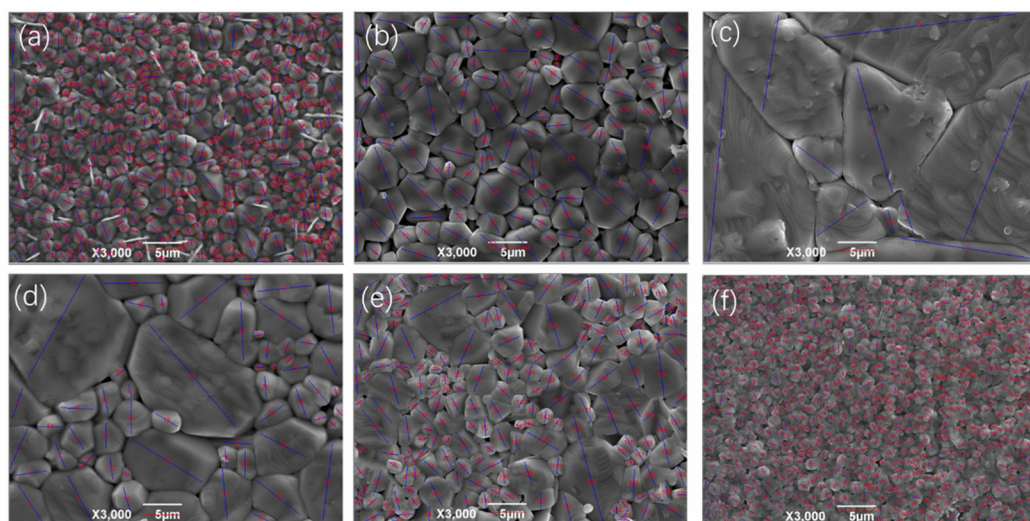

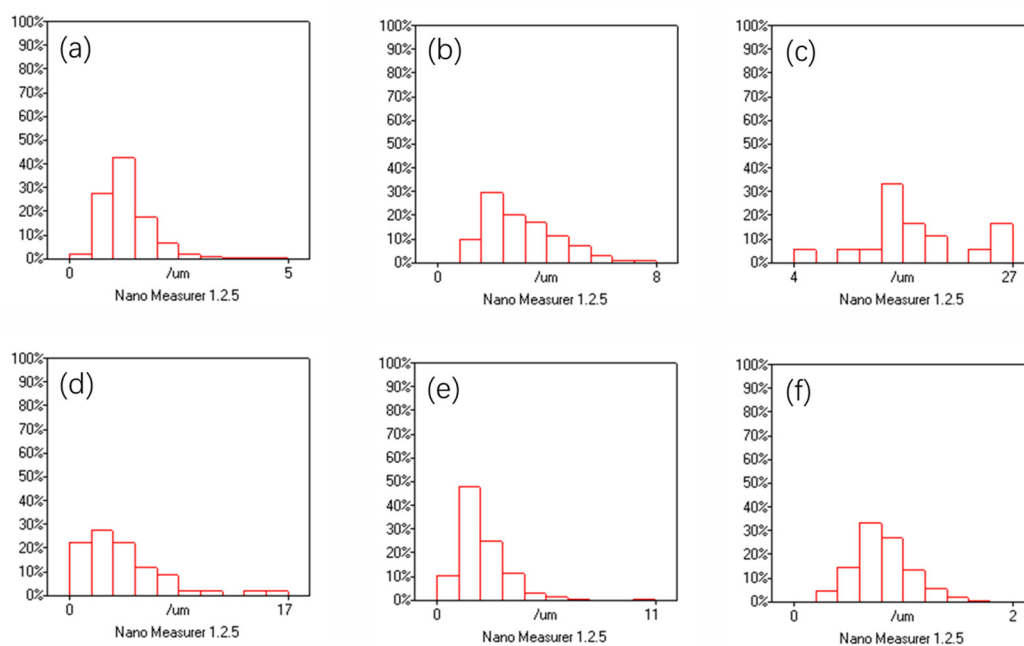

**Figure S3.** SEM images of BZT-x % mol ceramics (a) 0% mol, (b) 0.5% mol, (c) 1.0% mol, (d) 1.5 % mol, (e) 2.0% mol and (f) 2.5 mol and statistical chart.

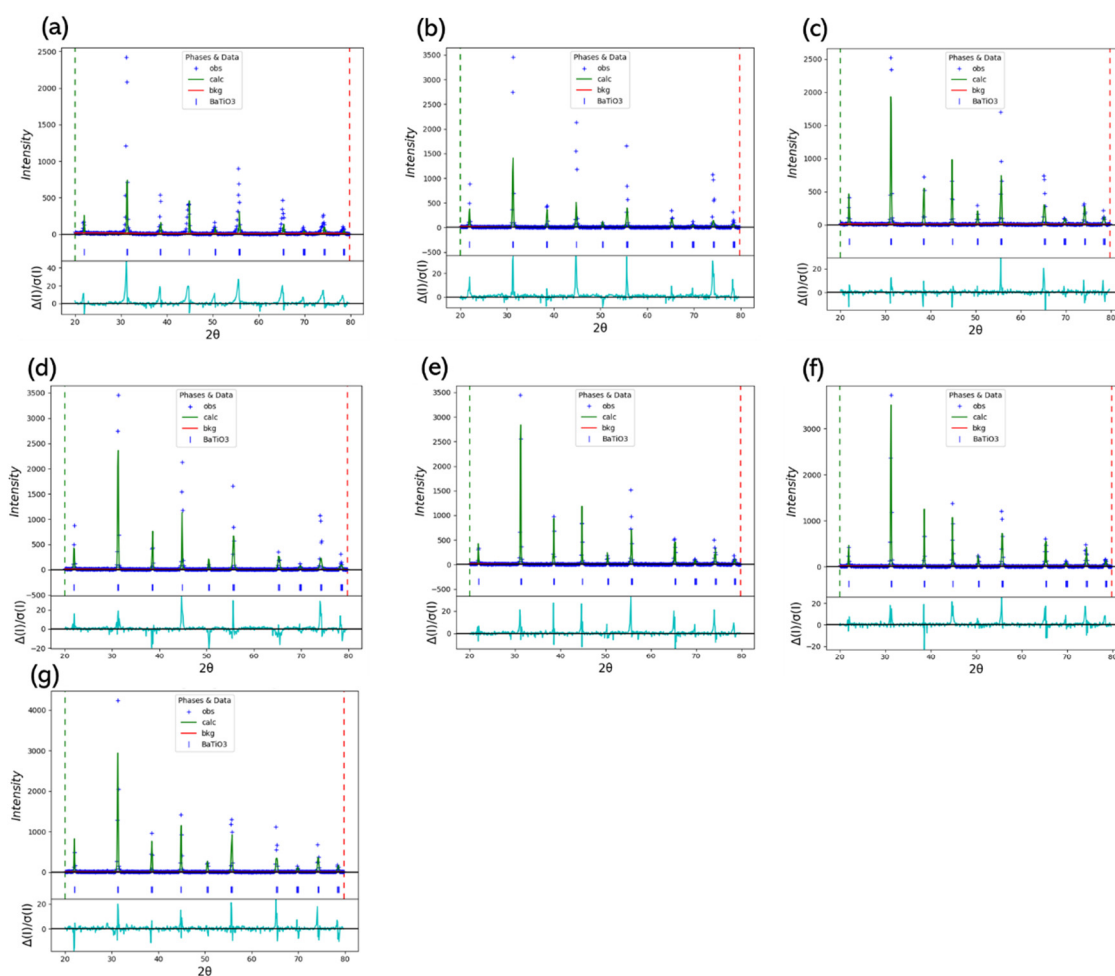

**Figure S4.** Rietveld refined room temperature XRD patterns for the BZT-x % mol ceramics. (a) 0% mol, (b) 0.25% mol, (c) 0.5% mol, (d) 1.0% mol, (e) 1.5 % mol, (f) 2.0% mol and (g) 2.5 mol.

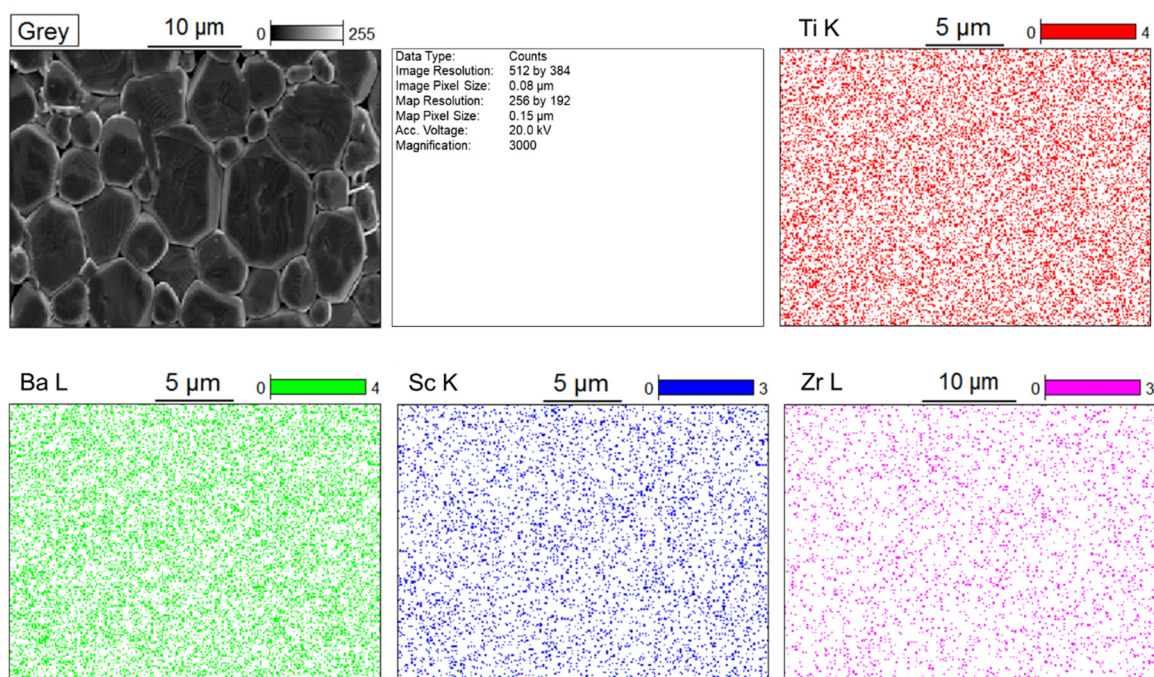

**Figure S5.** EDX map of 2.0% mol-BZT ceramics and correlation test parameter.

**Table S1.** Lattice constants fitting precision parameters of x-mol-BZT ceramics refined by Rietveld method.

| Sc Content (%) | a = b    | c        | Reliability Factors |       |          |
|----------------|----------|----------|---------------------|-------|----------|
|                |          |          | $R_{wp}$            | $R_p$ | $\chi^2$ |
| 0 mol %        | 4.026819 | 4.078185 | 5.17%               | 4.26% | 5.327    |
| 0.25 mol %     | 4.028764 | 4.083561 | 6.18%               | 4.15% | 5.128    |
| 0.5 mol %      | 4.029351 | 4.096825 | 5.79%               | 3.78% | 4.462    |
| 1.0 mol %      | 4.030215 | 4.091254 | 5.62%               | 3.53% | 3.735    |
| 1.5 mol %      | 4.032451 | 4.083463 | 6.27%               | 3.57% | 4.177    |
| 2.0 mol %      | 4.034568 | 4.076389 | 5.36%               | 3.43% | 3.642    |
| 2.5 mol %      | 4.035672 | 4.071268 | 4.17%               | 3.17% | 2.873    |

**Table S2.** The content of elements is determined by EDX test.

| Element | Weight % | Weight Error (%) |
|---------|----------|------------------|
| O       | 17.41    | +/- 0.51         |
| Ti      | 19.06    | +/- 0.82         |
| Zr      | 6.27     | +/- 0.43         |
| Ba      | 56.41    | +/- 1.61         |
| Sc      | 0.85     | +/- 0.35         |
| Total   | 100.00   |                  |
